# Supplementary material
Source: MDPI journal article supplement (https://www.mdpi.com/search?q=nanomaterials-09-00331)
Supplement: s001 [file nanomaterials-09-00331-s001.pdf]

*Supplemental files*

## **Interaction of ethylene with $\text{Ir}_n$ (n = 1-10): From bare clusters to $\gamma\text{-Al}_2\text{O}_3$ -supported nanoparticles**

**Xue-Rong Shi <sup>1,2\*</sup>, Yajing Zhang <sup>1</sup>, Shibiao Zong <sup>1</sup>, Wen Gu <sup>1</sup>, Pan Ma <sup>1</sup>, and Na Lu <sup>1</sup>**

<sup>1</sup> School of Material Engineering, Shanghai University of Engineering Science, 333 Longteng Road, Songjiang District, Shanghai 201620, P. R. China; shixuer05@mails.ucas.ac.cn(X.-R.S.), M050118113@sues.edu.cn(Y.Z.), M050117110@sues.edu.cn(S.Z.), guwen1-1@163.com(W.G.), mapan@sues.edu.cn(P.M.), 05160003@sues.edu.cn(N.L.)

<sup>2</sup> Institute of Physical Chemistry, University of Innsbruck, Innrain 80-82, Innsbruck A-6020, Austria

\* Correspondence: shixuer05@mails.ucas.ac.cn; Tel.: +86-21-6779-1380

**Table S1:** Geometry, magnetic moment ( $M$ ), and energy of gas phase  $\text{Ir}_n$  ( $n = 2-10$ ) clusters.

| n  | Geometry       | $M$ [ $\mu_B$ ]          | $d(\text{Ir-Ir})$ [ $\text{\AA}$ ] | CE <sup>a</sup> [eV/atom]                      | BE <sup>b</sup> [eV] |
|----|----------------|--------------------------|------------------------------------|------------------------------------------------|----------------------|
| 2  | $D_{\infty h}$ | 4(4 <sup>c</sup> )       | 2.21(2.21 <sup>c</sup> )           | -2.68(-2.61 <sup>c</sup> )                     | -5.36                |
| 3  | $D_{\infty h}$ | 1(1 <sup>c</sup> )       | 2.18(2.18 <sup>c</sup> )           | -3.36(-3.27 <sup>c</sup> )                     | -5.03                |
| 4  | $D_{4h}$       | 4(4 <sup>c,d</sup> )     | 2.31(2.31 <sup>c</sup> )           | -3.92(-3.85 <sup>c</sup> , 3.77 <sup>d</sup> ) | -3.92                |
| 5  | $C_{4v}$       | 5(5 <sup>c,e</sup> )     | 2.47(2.47 <sup>c</sup> )           | -4.16(-4.08 <sup>c</sup> , 4.01 <sup>d</sup> ) | -2.60                |
| 6  | $D_{3h}$       | 6(6 <sup>c,e</sup> )     | 2.42(2.42 <sup>c</sup> )           | -4.54(-4.45 <sup>c</sup> , 4.38 <sup>d</sup> ) | -3.03                |
| 7  | $C_{2v}$       | 11(11 <sup>c,d,e</sup> ) | 2.51(2.51 <sup>c</sup> )           | -4.64(-4.56 <sup>c</sup> , 4.51 <sup>d</sup> ) | -2.50                |
| 8  | $O_h$          | 0(0 <sup>c,d,e</sup> )   | 2.37(2.37 <sup>c</sup> )           | -5.08(-5.00 <sup>c</sup> , 4.90 <sup>d</sup> ) | -3.39                |
| 9  | $C_s$          | 3(3 <sup>c,e</sup> )     | 2.38(2.39 <sup>c</sup> )           | -5.08(-5.00 <sup>c</sup> , 4.90 <sup>d</sup> ) | -3.27                |
| 10 | $C_{2v}$       | 4(4 <sup>d,e</sup> )     | 2.42(2.42 <sup>c</sup> )           | -5.23(-5.15 <sup>c</sup> , 5.02 <sup>d</sup> ) | -3.08                |

<sup>a</sup> Cohesive energy =  $(E[\text{Ir}_n] - nE[\text{Ir}])/n$

<sup>b</sup> Bond energy =  $n\text{CE}/m$  where  $m$  is the number of Ir-Ir bonds in the cluster

<sup>c</sup> Ref.[1], VASP code, PW91 functional, 380 eV;

<sup>d</sup> Ref.[2], VASP code, PW91 functional, 300 eV;

<sup>e</sup> Ref.[3], Dmol<sup>3</sup> code, BPW91 functional

**Table S2:** Adsorption energy  $E_{\text{ads}}$  (eV) and Nucleation energy  $E_{\text{nuc}}$  (eV) for  $\text{Ir}_n$  clusters on  $\gamma\text{-Al}_2\text{O}_3$  surfaces.

| N  | $E_{\text{ads}}$                    |                                                | $E_{\text{nuc}}$                    |                                                |
|----|-------------------------------------|------------------------------------------------|-------------------------------------|------------------------------------------------|
|    | $\gamma\text{-Al}_2\text{O}_3(110)$ | $\gamma\text{-Al}_2\text{O}_3(001)^{\text{a}}$ | $\gamma\text{-Al}_2\text{O}_3(110)$ | $\gamma\text{-Al}_2\text{O}_3(001)^{\text{a}}$ |
| 1  | -2.58                               | --                                             | --                                  | --                                             |
| 2  | -2.53                               | -1.03                                          | -2.73                               | -2.77                                          |
| 3  | -3.67                               | -1.17                                          | -3.01                               | -2.75                                          |
| 4  | -4.12                               | -2.65                                          | -3.00                               | -4.31                                          |
| 5  | -3.74                               | -2.18                                          | -2.92                               | -4.04                                          |
| 6  | -3.92                               | -0.81                                          | -4.05                               | -3.19                                          |
| 7  | -3.38                               | -1.82                                          | -2.18                               | -4.44                                          |
| 8  | -2.16                               | -1.96                                          | -4.33                               | -6.48                                          |
| 9  | -2.74                               | -1.64                                          | -3.06                               | -3.33                                          |
| 10 | -2.98                               | -1.78                                          | -4.25                               | -4.71                                          |

<sup>a</sup> Ref.[1], VASP code, PW91 functional, cutoff energy 380 eV.

## M configuration of ethylene adsorption

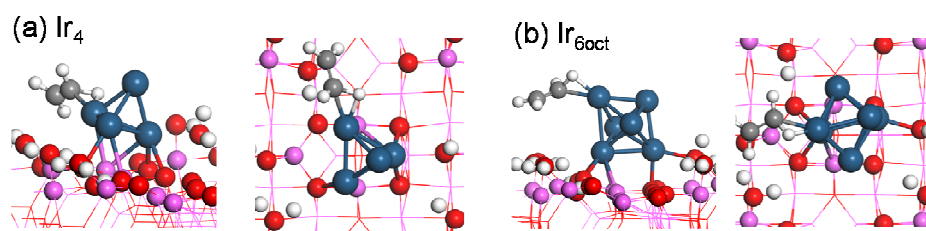

**Figure S1:** Most stable M configuration of ethylene adsorption on hydrated  $\gamma$ -Al<sub>2</sub>O<sub>3</sub>(110)-supported (a)Ir<sub>4</sub> and Ir<sub>6oct</sub>.

Linear fitting of ethylene deformation energy  $E_{\text{def}}(\text{C}_2\text{H}_4)$  (eV) and mean hybridization value of the carbon center in adsorbed ethylene.

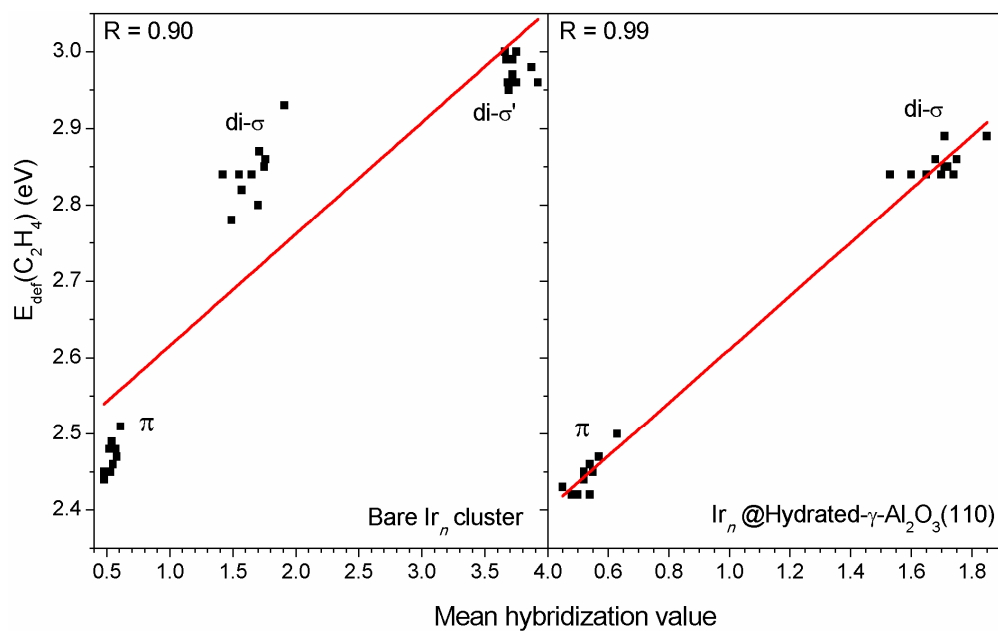

**Figure S2:** Ethylene deformation energy  $E_{\text{def}}(\text{C}_2\text{H}_4)$  via different modes as a function of mean hybridization value of the carbon center in adsorbed ethylene. The straight lines refer to linear fits.

## Reference

1. Chen, Y.; Huo, M.; Chen, T.; Li, Q.; Sun, Z.; Song, L. The properties of Ir<sub>n</sub> (n = 2-10) clusters and their nucleation on  $\gamma$ -Al<sub>2</sub>O<sub>3</sub> and MgO surfaces: from ab initio studies. *Phys Chem Chem Phys* **2015**, *17*, 1680–1687, doi:10.1039/c4cp04881d.
2. Pawluk, T.; Hirata, Y.; Wang, L. Studies of iridium nanoparticles using density functional theory calculations. *J Phys Chem B* **2005**, *109*, 20817–20823, doi:10.1021/jp053563b.
3. Du, J.; Sun, X.; Chen, J.; Jiang, G. A theoretical study on small iridium clusters: structural evolution, electronic and magnetic properties, and reactivity predictors. *J Phys Chem A* **2010**, *114*, 12825–12833, doi:10.1021/jp107366z.
